# Supplementary material for: Inducing drop to bubble transformation via resonance in ultrasound
Source: PubMed Central journal article supplement (PMC6133948; doi:10.1038/s41467-018-05949-0), 2018-09-11
Supplement: 41467_2018_5949_MOESM2_ESM.pdf [file 41467_2018_5949_MOESM2_ESM.pdf]

## Description of Additional Supplementary Files

### Supplementary Movie 1

Description: Droplet-to-bubble transition with increasing sound intensity of a SDS solution droplet (10  $\mu$ l), with a high speed camera titled at an angle  $\sim 35^\circ$ .

### Supplementary Movie 2

Description: Droplet-to-bubble transition with increasing sound intensity of a SDS solution droplet (10  $\mu$ l), side view.

### Supplementary Movie 3

Description: SDS solution droplet (10  $\mu$ l) buckles downwards with increasing sound intensity at levitation position II.

### Supplementary Movie 4

Description: SDS solution droplet (10  $\mu$ l) buckles downwards with increasing sound intensity at levitation position I when the levitator is inverted.

### Supplementary Movie 5

Description: Bubble formation with an acoustically levitated liquid film buckled via dragging with a needle from the center of the film.

### Supplementary Movie 6

Description: Bubble formation with an acoustically levitated liquid film buckled by dragging a ring of metal wire from the edge of the film.
